1 **Understanding the effects of Universal Test and Treat on**  
2 **longitudinal HIV care continuum outcomes among South African**  
3 **youth: a retrospective cohort study**

4  
5 Lindsey M. Filiatreau<sup>1,2§</sup>, Jessie K. Edwards<sup>3</sup>, Nkosinathi Masilela<sup>4</sup>, F. Xavier Gómez-Olivé<sup>4</sup>,  
6 Nicole Haberland<sup>5</sup>, Brian W. Pence<sup>3</sup>, Joanna Maselko<sup>3</sup>, Kathryn E. Muessig<sup>6</sup>, Chodziwadziwa  
7 Whiteson Kabudula<sup>4</sup>, Mi-Suk Kang Dufour<sup>7</sup>, Sheri A. Lippman<sup>4,7</sup>, Kathleen Kahn<sup>4</sup>, and Audrey  
8 Pettifor<sup>3,4,8</sup>

9  
10 1 Department of Psychiatry, School of Medicine, Washington University in St. Louis

11 2 International Center for Child Health and Development, Brown School, Washington University  
12 in St. Louis

13 3 Department of Epidemiology, Gillings School of Global Public Health, University of North  
14 Carolina at Chapel Hill, Chapel Hill, North Carolina, USA

15 4 MRC/Wits Rural Public Health and Health Transitions Research Unit (Agincourt), School of  
16 Public Health, Faculty of Health Sciences, University of the Witwatersrand, South Africa

17 5 Population Council, New York, New York, USA

18 6 Department of Health Behavior, Gillings School of Global Public Health, University of North  
19 Carolina at Chapel Hill, Chapel Hill, North Carolina, USA

20 7 Division of Prevention Science, Department of Medicine, University of California, San  
21 Francisco, San Francisco, California, USA

22 8 Carolina Population Center, Chapel Hill, North Carolina, USA

23

24 § Corresponding Author: Lindsey M. Filiatreau

25

26 Department of Psychiatry

27 660 S. Euclid Ave.

28 St. Louis, MO 63110

29 flindsey@wustl.edu

30 Phone: 502.827.3672

31 Fax: 314.935.8511

32

33 E-mail addresses of authors:

34 LMF: flindsey@wustl.edu

35 JKE: jessedwards@unc.edu

36 NM: Nkosinathi.masilela@wits.ac.za

37 FXG-O: f.gomez-olivecasas@wits.ac.za

38 NH: nhaberland@popcouncil.org

39 BWP: bpence@unc.edu

40 JM: jmaselko@unc.edu

41 KM: kmuessig@med.unc.edu

42 CWK: chodziwadziwa.kabudula@wits.ac.za

43 MKD: mi-suk@berkeley.edu

44 SAL: sheri.lippman@ucsf.edu

45 KK: Kathleen.kahn@wits.ac.za

46 AP: apettif@email.unc.edu

47 **Abstract**

48 **Introduction:** Little is known about when youth living with HIV (YLHIV) are most susceptible  
49 to disengagement from HIV care. The longitudinal HIV care continuum is an underutilized tool  
50 that can provide a holistic understanding of population-level HIV care trajectories and be used to  
51 compare treatment outcomes across groups. We aimed to explore effects of the Universal Test  
52 and Treat policy (UTT) on longitudinal care outcomes among South African youth living with  
53 HIV (YLHIV) and identify temporally precise opportunities for re-engaging this priority  
54 population.

55  
56 **Methods:** Using medical record and census data, we conducted a retrospective cohort study  
57 among youth aged 18-24 newly diagnosed with HIV between August 2015 and December 2018  
58 in nine health care facilities in rural South Africa. We used weighted Fine and Grey sub-  
59 distribution proportional hazards models to characterize longitudinal care continuum outcomes in  
60 the population overall and stratified by treatment era of diagnosis. We estimated the proportion  
61 of individuals in each stage of the continuum over time and the mean time spent in each stage in  
62 the first year following diagnosis. Estimates for the two groups were compared using differences  
63 (diagnosis pre-UTT=referent).

64  
65 **Results:** A total of 420 YLHIV were included. By the end of the first year following diagnosis,  
66 just 23% of individuals had no 90-or-more-day lapse in care and were virally suppressed. Those  
67 diagnosed in the UTT era spent less time as ART-naïve (mean difference=-19.3 days; 95% CI: -  
68 27.7, -10.9) and more time virally suppressed (mean difference=17.7; 95% CI: 1.0, 34.4)  
69 compared to those diagnosed pre-UTT adoption. Most individuals who were diagnosed in the

70 UTT era and experienced a 90-or-more-day lapse in care disengaged between diagnosis and  
71 linkage to care or ART initiation and viral suppression.

72

73 **Conclusions:** Implementation of UTT yielded modest improvements in time spent on ART and  
74 virally suppressed among South African YLHIV. However, meeting UNAIDS' 95-95-95 targets  
75 remains a challenge in this priority population. Retention in care and re-engagement  
76 interventions that can be implemented between diagnosis and linkage to care (e.g., longitudinal  
77 counseling following diagnosis) or ART initiation and viral suppression may be particularly  
78 important to improving treatment outcomes among South African YLHIV.

79

80

81 **Keywords:** Universal Test and Treat; HIV care continuum; youth living with HIV; South Africa;  
82 viral suppression; retention in care

## 83 **Introduction**

84 Traditional methods for monitoring HIV treatment outcomes often fail to capture the complexity  
85 of the processes of engagement, disengagement, and reengagement in care that individuals living  
86 with HIV may cycle through over time. The longitudinal HIV care continuum framework is an  
87 underutilized alternative to these approaches that can provide a more nuanced picture of  
88 population-level outcomes over time (1,2). This tool may be particularly useful for assessing  
89 holistic differences in treatment outcomes in distinct groups and can be harnessed to identify  
90 specific gaps in treatment and care services at precise time points following diagnosis (1,3).

91  
92 Existing evidence suggests youth living with HIV (YLHIV) experience worse HIV treatment  
93 outcomes at each stage in the HIV care continuum compared to adults (4–8). In sub-Saharan  
94 Africa, YLHIV are particularly vulnerable to suboptimal treatment outcomes (7,9). A 2016 meta-  
95 analysis conducted by Zanoni and colleagues found that just 14% of South African YLHIV aged  
96 15 to 24 accessed antiretroviral treatment (ART) (10). Among those who accessed treatment, an  
97 estimated 83% were retained in care and 81% were virally suppressed, yielding an overall  
98 prevalence of suppression of 10% (10).

99  
100 In line with the World Health Organization’s treatment recommendations, the South African  
101 government adopted a Universal Test and Treat (UTT) policy in September 2016 (11). This  
102 policy increased access to ART for all people living with HIV regardless of clinical stage and  
103 improved a number of HIV treatment outcomes among South African adults living with HIV  
104 (12). However, some studies suggest UTT increased attrition from care following treatment  
105 initiation (13). While little is known about the specific effects of this policy on treatment

106 outcomes among YLHIV specifically, current data suggest poor retention in care and viral  
107 suppression persist in the population (14,15).

108  
109 Addressing barriers to sustained engagement in care among YLHIV is critical if we are to end  
110 the HIV epidemic by 2030 (8,16). Yet, a limited number of studies have identified temporally  
111 precise opportunities for re-engaging this population following lapses in care (6). We draw on  
112 the longitudinal HIV care continuum framework to estimate the proportion of individuals in each  
113 stage of the HIV care continuum over time and the restricted mean time spent in each stage  
114 during the first year following diagnosis in a population of YLHIV in rural South Africa. We  
115 compare these outcomes by treatment era of diagnosis-- pre- or post-UTT implementation-- to  
116 illuminate the effects of this policy on longitudinal care trajectories and opportunities for re-  
117 engaging this priority population under current treatment recommendations.

118

## 119 **Methods**

### 120 **Study site**

121 This study was conducted in the Agincourt Health and Socio-Demographic Surveillance System  
122 study area (HDSS) in rural Mpumalanga Province, South Africa (17). This area is approximately  
123 500 kilometers northeast of Johannesburg (17) and home to nearly 120,000 individuals (18). An  
124 estimated 27% of young women and 6% of young men ages 20 to 24 in this area are living with  
125 HIV (19). Access to public sector services and economic opportunities post-schooling is limited,  
126 contributing to a high degree of work-related migration, particularly among youth exiting the  
127 school system (20). Nine publicly funded health care facilities provide medical services to a  
128 majority of study area residents. Within these facilities, access to primary health care and ART is

129 free of charge. However, patient wait times often exceed national standards and there is limited  
130 to no differentiated care for young people (21).

131

### 132 **Study population**

133 We extracted data for all individuals aged 18 to 24 with a recorded HIV diagnosis in the HDSS-  
134 Clinic Link System (n=685), described in further detail below, between August 1<sup>st</sup>, 2015, and  
135 December 31<sup>st</sup>, 2018. Individuals who were not diagnosed in one of the nine publicly funded  
136 health care facilities used by residents of the Agincourt HDSS (n=251), had a viral load  
137 measurement below 400 copies/mL within seven days of diagnosis (n=29) or migrated into the  
138 Agincourt HDSS after their first HIV diagnosis (n=16) were excluded from the analysis to ensure  
139 participants were diagnosed and entered HIV care in an Agincourt HDSS facility.

140

### 141 **Data source**

142 We used data from the Agincourt HDSS-Clinic Link System, previously described, to determine  
143 population clinical outcomes (22–25). Briefly, the Clinic Link System is a population-based  
144 clinical care database that covers consenting/assenting patients seeking HIV-specific services or  
145 chronic care in all nine publicly funded health care facilities used by study area residents. Data  
146 typists, stationed at each of the facilities since 2014, consent/assent patients seeking care on a  
147 daily basis. After obtaining written informed consent/assent, clinical visit data and patient  
148 demographic data are captured in the Clinic Link System and linked to corresponding records in  
149 the Agincourt HDSS census database. Data typists continually update clinical records data as  
150 individuals return for services.

151

152 Because the HDSS-Clinic Link System viral load data were occasionally missing, viral load  
153 measurements were supplemented using viral load data from the South African National Health  
154 Laboratory Service. The South African National Health Laboratory Service provides HIV  
155 diagnostic services to approximately 80% of South Africans and conducted more than 5 million  
156 viral load tests across 16 laboratories in 2018 (26,27).

157  
158 Mortality and migration data were obtained from the Agincourt HDSS census database and  
159 linked to the HDSS-Clinic Link System data. The Agincourt HDSS database has been updated  
160 annually since 2000 and provides information on resident status and vital events such as  
161 migrations, births, and deaths (17).

162

### 163 **Measures**

164 *Linkage to care:* Individuals were considered linked to care on the first of the following dates:  
165 results delivered for CD4 testing after HIV diagnosis, a follow-up visit with an indication of HIV  
166 treatment delivery, or a CD4 or viral load test after HIV diagnosis.

167

168 *Loss to follow-up:* Participants with no documented clinic visits for any given 90-day period  
169 following diagnosis were considered lost to follow-up (LTFU) on the first date the definition was  
170 met (i.e., the 90<sup>th</sup> day following the most recent visit date). This definition is consistent with a  
171 lapse in medication coverage defined in the South African national HIV adherence guidelines  
172 (28). We also considered a 180-day clinic visit lapse definition of LTFU. Results from this  
173 analysis are presented in the Supplemental Material.

174



175 *Treatment status:* Participants were considered on ART the first date of any HIV treatment  
176 medication pickup. Individuals who had a suppressed viral load measurement prior to the first  
177 recorded ART pickup date (n=3) were considered on ART the same date as the suppressed viral  
178 load measurement.

179  
180 *Viral suppression status:* Viral load measurements less than 400 copies/mL were considered  
181 virally suppressed (29,30).

182  
183 *Virologic failure:* Viral load measurements of 1000 copies/mL and above subsequent to a  
184 suppressed viral load measurement were considered indicative of virologic failure (31,32).

185  
186 *Suboptimal treatment outcome:* Because death (n=1) and virologic failure (n=3) were uncommon  
187 in the study population overall, we combined the competing events of LTFU, death, and  
188 virologic failure in a “suboptimal treatment outcomes” measure.

189  
190 **Statistical analysis**

191 To characterize the longitudinal HIV care continuum in the study population we utilized analytic  
192 methods similar to those formalized by Lesko et. al (3). These methods are designed to account  
193 for competing events and transitions into and out of multiple states over time (2). First, we fit a  
194 Fine and Grey sub-distribution proportional hazards models with no covariates and used the  
195 Breslow estimator to calculate the cumulative incidence of each of the following care continuum  
196 events following diagnosis: suboptimal treatment outcome prior to linkage to care; linkage to  
197 care; suboptimal treatment outcome prior to ART initiation (and after linkage to care); ART

198 initiation; suboptimal treatment outcome prior to viral suppression (and after ART initiation);  
199 viral suppression; suboptimal treatment outcome following suppression (see S1 Table for  
200 additional details and competing events). Date of diagnosis served as the origin for each outcome  
201 and administrative censoring occurred on day 365 following diagnosis or February 1, 2019. Once  
202 an individual was LTFU, they were not permitted to reenter the study population.

203  
204 We then estimated the proportion of the population in eight mutually exclusive stages of the HIV  
205 care continuum at each timepoint following diagnosis (i.e. on any day during the 365 days of  
206 follow-up):

- 207 1) Diagnosed with HIV- not yet linked to care
- 208 2) Suboptimal treatment outcome before linkage to care
- 209 3) Linked to care- ART naïve
- 210 4) Suboptimal treatment outcome after linkage to care but before ART initiation
- 211 5) On ART- virally non-suppressed
- 212 6) Suboptimal treatment outcome after ART initiation but before viral suppression
- 213 7) On ART- virally suppressed
- 214 8) Suboptimal treatment outcome after suppression

215 This was accomplished by adding and subtracting cumulative incidence curves (see S2 Table for  
216 equations). The proportion of individuals in each stage of the continuum is presented as a set of  
217 stacked curves that sum to one at each time point by design. The area between adjacent curves  
218 represents the restricted (as each participant is followed for a maximum of one year and all  
219 outcomes may not be observed) mean time spent in each stage over the one-year follow-up  
220 period. Given individuals who were LTFU were not permitted to reenter the study population,

221 estimates of the mean time spent linked to care- ART naïve; on ART- virally non-suppressed;  
222 and on ART- virally suppressed, represent the mean time spent in each of these stages with no  
223 prior 90-or-more day gap in care. Potential care continuum transitions are specified in the S1  
224 Figure.

225  
226 Ultimately, we estimated 1) the proportion of participants in each stage of the continuum and 2)  
227 the restricted mean time spent in each stage of the continuum over the one-year period following  
228 diagnosis in the cohort overall and stratified by treatment era of diagnosis. We used inverse  
229 probability of treatment weights to account for meaningful differences in the distribution of sex  
230 and age at diagnosis between the two groups. We calculated differences in outcomes among  
231 those diagnosed pre- (referent) and post-UTT implementation and estimated the 95% Wald  
232 confidence intervals (CI) using the standard error of estimates obtained from 300 non-parametric  
233 resamples of the data (33). All analyses were conducted in SAS 9.4 (SAS Institute Inc., Cary,  
234 NC).

235

## 236 **Ethics**

237 This study was approved by the University of North Carolina at Chapel Hill's Institutional  
238 Review Board, the University of the Witwatersrand's Human Research Ethics Committee, and  
239 the Mpumalanga Provincial Health Research Committee.

240

## 241 **Results**

242 A total of 420 individuals were included. A majority were female (n=389; 92.6%) and diagnosed  
243 after the adoption of UTT (n=266; 63.3%) (Table 1). Median age at diagnosis was 22.2

244 (interquartile range [IQR]: 20.4-23.7) and median CD4 cell count at diagnosis or entry into care  
 245 was 333 (IQR: 217-458) (Table 1).

246

247 **Table 1. Characteristics of study participants, stratified by treatment era of diagnosis**

|                                                                          | <b>Total<br/>(n=420)<br/>n (%)</b> | <b>Pre-UTT<br/>(n=154)<br/>n (%)</b> | <b>UTT<br/>(n=266)<br/>n (%)</b> |
|--------------------------------------------------------------------------|------------------------------------|--------------------------------------|----------------------------------|
| Sex                                                                      |                                    |                                      |                                  |
| Female                                                                   | 389 (92.6)                         | 146 (94.8)                           | 243 (91.4)                       |
| Male                                                                     | 31 (7.4)                           | 8 (5.2)                              | 23 (8.6)                         |
| Age at diagnosis (median/IQR)                                            | 22.2 (20.4-<br>23.7)               | 22.3 (20.7-<br>23.6)                 | 22.2 (20.3-23.6)                 |
| CD4 cell count at diagnosis/entry into care<br>(median/IQR) <sup>†</sup> | 333 (217-458)                      | 329 (200-438)                        | 333.5 (220.5-<br>482.5)          |
| <200 cells/mm <sup>3</sup>                                               | 74 (22.5)                          | 32 (24.8)                            | 42 (21.0)                        |
| ≥200 cells/mm <sup>3</sup>                                               | 255 (77.5)                         | 97 (75.2)                            | 158 (79.0)                       |

248 Abbreviations: IQR- interquartile range; UTT- Universal Test and Treat

249 <sup>†</sup>missing baseline CD4 n=91

250

251 At day 90 post-diagnosis, 81.8% of all participants had ever linked to care, 61.6% had ever  
 252 initiated ART, and 5.9% had ever achieved viral suppression (S2 Figure). Over one-third  
 253 (33.8%) were LTFU on day 90 (S2 Figure). By 6 and 12 months post-diagnosis, 16.9% and  
 254 30.9% of all participants had ever achieved viral suppression, respectively (S2 Figure). By the  
 255 end of the first year following diagnosis, 68.2% of all participants were LTFU, 0.2% had died,  
 256 and 0.7% had experienced virologic failure. Participants spent a mean time of 19.5 days (95%  
 257 CI: 16.0, 23.0) between diagnosis and linkage to care; 29.4 days (95% CI: 25.6, 33.3) linked to  
 258 care but ART-naive; 107.4 days (95% CI: 95.9, 118.8) on ART but virally non-suppressed; and  
 259 53.7 days (95% CI: 45.2, 62.2) virally suppressed (Table 2).

260 **Table 2. Time spent in each stage of care continuum over 1-year follow-up period and**  
 261 **percent of individuals in each stage at end of follow-up**

|                                                 | <b>Mean days<br/>(95% CI)</b> | <b>Percent<br/>(95% CI)</b> |
|-------------------------------------------------|-------------------------------|-----------------------------|
| Diagnosed with HIV (not yet linked)             | 19.5 (16.0, 23.0)             | 0.1 (0.0, 0.3)              |
| Suboptimal treatment outcome before linkage     | 49.7 (40.0, 59.4)             | 18.0 (14.4, 21.7)           |
| Linked to care (ART naïve)                      | 29.4 (25.6, 33.3)             | 0.0 (0.0, 0.0)              |
| Suboptimal treatment outcome before ART         | 49.9 (39.9, 59.8)             | 18.5 (14.8, 22.3)           |
| On ART (non-suppressed)                         | 107.4 (95.9, 118.8)           | 7.3 (4.5, 10.1)             |
| Suboptimal treatment outcome before suppression | 48.8 (40.3, 57.2)             | 25.0 (20.8, 29.3)           |
| Virally suppressed                              | 53.7 (45.2, 62.2)             | 23.0 (18.7, 27.3)           |
| Suboptimal treatment outcome after suppression  | 6.7 (4.1, 9.3)                | 7.9 (5.3, 10.5)             |

262 Abbreviations: ART- antiretroviral therapy; CI- confidence interval; UTT- Universal Test and Treat

263

264 In weighted analyses, individuals diagnosed in the UTT era initiated ART more quickly after  
 265 linkage to care (restricted mean time difference [MD] of time between linkage to care and ART  
 266 initiation: -18.9; 95% CI: -27.3, -10.6), and spent more time over the one-year follow-up period  
 267 on ART and virally suppressed when compared to those diagnosed in the pre-UTT era (MD of  
 268 time spent on ART- virally non-suppressed: 12.7; 95% CI: -8.2, 33.7; MD of time spent virally  
 269 suppressed: 17.7; 95% CI: 1.0, 34.4) (Table 3). Compared to their counterparts, time spent LTFU  
 270 between diagnosis and linkage to care was greater among those diagnosed in the UTT era while  
 271 time spent between linkage to care and ART initiation was greater among those diagnosed in the  
 272 pre-UTT era (Table 3).

273 **Table 3. Time spent in each stage of the HIV care continuum over 1-year follow-up period by treatment era of diagnosis**

|                                                 | <b>Pre-UTT<br/>Mean days<br/>(95% CI)</b> | <b>UTT<br/>Mean days<br/>(95% CI)</b> | <b>Difference in mean<br/>days<br/>(95% CI)</b> |
|-------------------------------------------------|-------------------------------------------|---------------------------------------|-------------------------------------------------|
| <b>Crude</b>                                    |                                           |                                       |                                                 |
| Diagnosed with HIV (not yet linked)             | 17.3 (11.9, 22.7)                         | 21.4 (16.8, 26.0)                     | 4.1 (-2.9, 11.2)                                |
| Suboptimal treatment outcome before linkage     | 40.8 (26.7, 55.0)                         | 54.7 (42.0, 67.3)                     | 13.8 (-5.0, 32.7)                               |
| Linked to care (ART naïve)                      | 41.3 (33.6, 49.0)                         | 22.3 (18.7, 26.0)                     | -18.9 (-27.3, -10.6)                            |
| Suboptimal treatment outcome before ART         | 66.9 (47.9, 85.9)                         | 40.0 (29.2, 50.8)                     | -26.9 (-48.7, -5.1)                             |
| On ART (non-suppressed)                         | 99.2 (82.2, 116.3)                        | 111.8 (97.6, 125.9)                   | 12.5 (-8.5, 33.5)                               |
| Suboptimal treatment outcome before suppression | 51.3 (37.4, 65.2)                         | 47.2 (36.3, 58.1)                     | -4.1 (-21.5, 13.3)                              |
| Virally suppressed                              | 43.2 (31.0, 55.5)                         | 59.6 (47.9, 71.3)                     | 16.4 (-0.4, 33.1)                               |
| Suboptimal treatment outcome after suppression  | 4.9 (1.4, 8.4)                            | 8.0 (4.4, 11.5)                       | 3.1 (-1.9, 8.0)                                 |
| <b>Weighted<sup>†</sup></b>                     |                                           |                                       |                                                 |
| Diagnosed with HIV (not yet linked)             | 16.9 (11.6, 22.1)                         | 21.3 (16.7, 25.8)                     | 4.4 (-2.5, 11.3)                                |
| Suboptimal treatment outcome before linkage     | 39.8 (26.0, 53.6)                         | 54.0 (41.4, 66.7)                     | 14.2 (-4.3, 32.7)                               |
| Linked to care (ART naïve)                      | 41.5 (33.7, 49.3)                         | 22.2 (18.6, 25.9)                     | -19.3 (-27.7, -10.9)                            |
| Suboptimal treatment outcome before ART         | 66.1 (47.2, 85.1)                         | 39.5 (28.8, 50.2)                     | -26.6 (-48.3, -5.0)                             |
| On ART (non-suppressed)                         | 99.4 (82.4, 116.4)                        | 112.1 (98.0, 126.2)                   | 12.7 (-8.2, 33.7)                               |
| Suboptimal treatment outcome before suppression | 54.0 (39.4, 68.6)                         | 47.7 (36.7, 58.7)                     | -6.3 (-24.4, 11.8)                              |
| Virally suppressed                              | 42.2 (30.1, 54.4)                         | 59.9 (48.2, 71.6)                     | 17.7 (1.0, 34.4)                                |
| Suboptimal treatment outcome after suppression  | 5.0 (1.4, 8.7)                            | 8.2 (4.5, 11.9)                       | 3.2 (-2.0, 8.4)                                 |

274 Abbreviations: ART- antiretroviral therapy; CI- confidence interval; UTT- Universal Test and Treat

275 <sup>†</sup>Weighted to account for differences in age at diagnosis and sex by treatment era of diagnosis

276 By the end of follow-up, 85.2% of participants diagnosed in the pre-UTT era had ever linked to  
277 care, 60.1% had ever initiated ART, and 26.0% had ever achieved viral suppression (Figure).  
278 Among those diagnosed in the UTT era, 80.2% had ever linked to care, 65.7% had ever initiated  
279 ART, and 33.3% had ever achieved viral suppression (Figure). On the last day of follow-up,  
280 5.7% of participants diagnosed in the pre-UTT era were on ART but non-suppressed, and 19.5%  
281 were virally suppressed (Table 4; Figure). Among those diagnosed in the UTT era, 8.5% were on  
282 ART but non-suppressed, and 24.5% were virally suppressed (Table 4; Figure). Over 70% of  
283 participants diagnosed in the pre-UTT era, as compared to just over 60% in the post-UTT era  
284 experienced a suboptimal treatment outcome by the end of the first year following diagnosis with  
285 HIV (Table 4; Figure). Suboptimal outcomes between linkage to care and ART initiation were  
286 more common among those diagnosed in the pre-UTT versus UTT era by the end of study  
287 follow-up and sub-optimal outcomes between diagnosis and linkage to care were more common  
288 among those diagnosed in the UTT versus pre-UTT (Table 4; Figure). Approximately 25% of  
289 those diagnosed in both the pre-UTT and UTT eras were LTFU between ART initiation and viral  
290 suppression (Table 4; Figure).

291

292 In analyses using the less restrictive LTFU definition, differences in the restricted mean time  
293 spent in each stage of the care continuum and the proportion in each stage at the end of the one-  
294 year follow-up period were attenuated (S3-5 Tables).

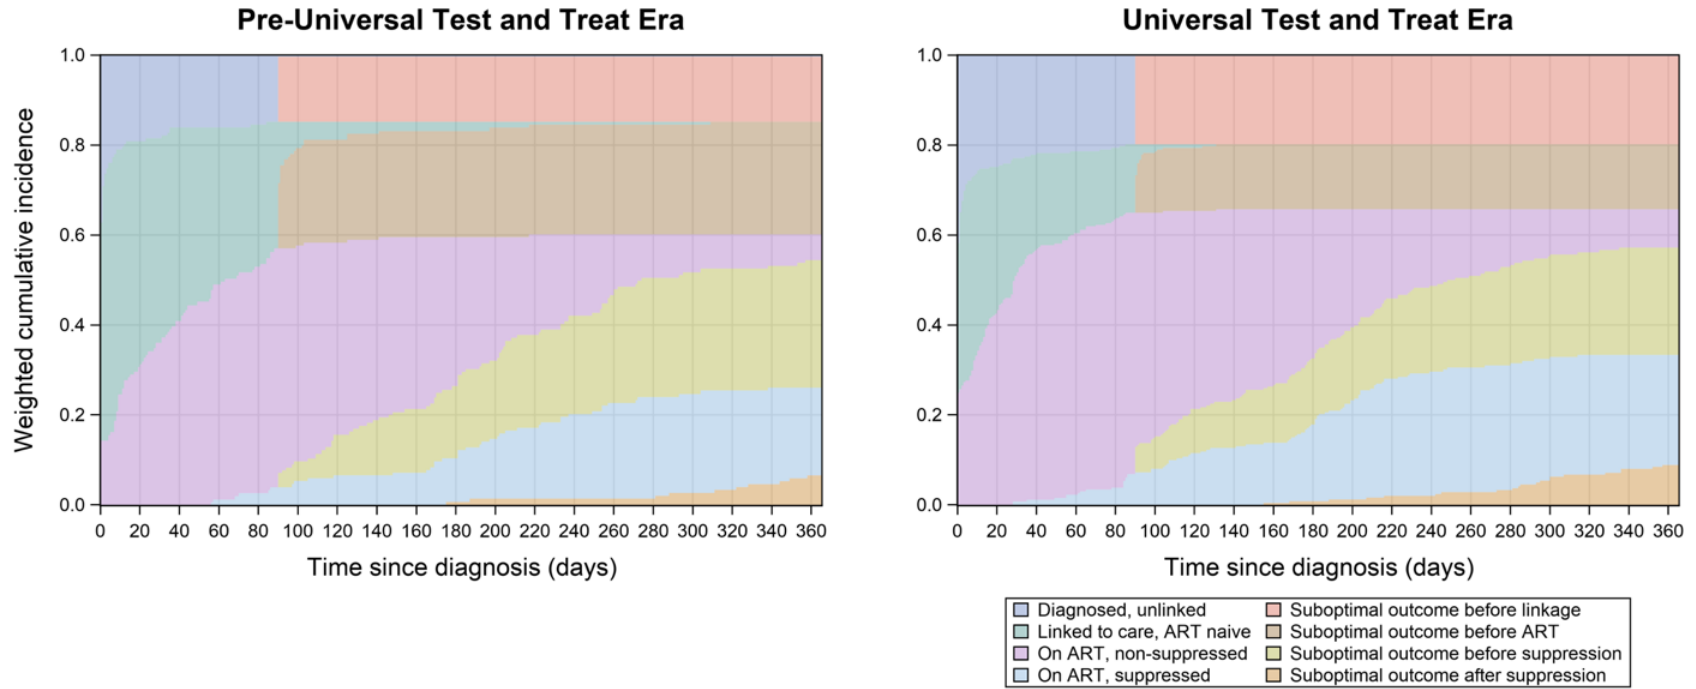

295

296 **Figure. Cumulative incidence of HIV care outcomes over 1-year following diagnosis, stratified by treatment era**

297 Abbreviations: ART- antiretroviral treatment; LTFU- lost to follow-up; UTT- Universal Test and Treat

298 Weighted to account for differences in age at diagnosis and sex by era of diagnosis



299 **Table 4. Proportion of participants in each stage of the HIV care continuum 1-year following diagnosis by treatment era of**  
 300 **diagnosis**

|                                                 | <b>Pre-UTT</b><br>Percent (95% CI) | <b>UTT</b><br>Percent (95% CI) | <b>Percent difference</b><br>(95% CI) |
|-------------------------------------------------|------------------------------------|--------------------------------|---------------------------------------|
| <b>Crude</b>                                    |                                    |                                |                                       |
| Diagnosed with HIV (not yet linked)             | 0.4 (0.0, 0.7)                     | 0.2 (0.0, 0.4)                 | -0.2 (-0.6, 0.3)                      |
| Suboptimal treatment outcome before linkage     | 14.8 (9.6, 20.1)                   | 19.9 (15.2, 24.6)              | 5.0 (-2.0, 12.0)                      |
| Linked to care (ART naïve)                      | 0.0 (-0.1, 0.1)                    | 0.0 (0.0, 0.0)                 | 0.0 (-0.1, 0.1)                       |
| Suboptimal treatment outcome before ART         | 25.2 (18.0-32.4)                   | 14.6 (10.6-18.7)               | -10.6 (-18.8, -2.4)                   |
| On ART (non-suppressed)                         | 5.8 (2.1, 9.6)                     | 8.5 (4.7, 12.3)                | 2.6 (-2.5, 7.8)                       |
| Suboptimal treatment outcome before suppression | 27.2 (20.3-34.1)                   | 23.6 (18.2-28.9)               | -3.6 (-12.3, 5.0)                     |
| Virally suppressed                              | 20.1 (13.6, 26.5)                  | 24.5 (19.1, 29.9)              | 4.5 (-3.7, 12.7)                      |
| Suboptimal treatment outcome after suppression  | 6.5 (3.0-10.0)                     | 8.7 (5.2-12.3)                 | 2.2 (-2.7, 7.2)                       |
| <b>Weighted<sup>a</sup></b>                     |                                    |                                |                                       |
| Diagnosed with HIV (not yet linked)             | 0.4 (0.0, 0.7)                     | 0.2 (0.0, 0.4)                 | -0.2 (-0.6, 0.3)                      |
| Suboptimal treatment outcome before linkage     | 14.5 (9.3-19.6)                    | 19.6 (14.9-24.3)               | 5.2 (-0.2, 12.0)                      |
| Linked to care (ART naïve)                      | 0.0 (-0.1, 0.1)                    | 0.0 (0.0, 0.0)                 | 0.0 (-0.1, 0.1)                       |
| Suboptimal treatment outcome before ART         | 25.0 (17.8-32.2)                   | 14.4 (10.4-18.5)               | -10.6 (-18.8, -2.4)                   |
| On ART (non-suppressed)                         | 5.7 (2.0, 9.4)                     | 8.5 (4.7, 12.3)                | 2.8 (-2.3, 7.9)                       |
| Suboptimal treatment outcome before suppression | 28.4 (21.3-35.5)                   | 23.9 (18.5-29.2)               | -4.5 (-13.4, 4.4)                     |
| Virally suppressed                              | 19.5 (13.1, 25.9)                  | 24.5 (19.1, 29.9)              | 5.0 (-3.1, 13.1)                      |
| Suboptimal treatment outcome after suppression  | 6.5 (3.0-10.1)                     | 8.9 (5.2-12.5)                 | 2.3 (-2.7, 7.4)                       |

301 Abbreviations: UTT- Universal Test and Treat; ART- antiretroviral therapy; CI- confidence interval

302 <sup>†</sup>Weighted to account for differences in age at diagnosis and sex by treatment era of diagnosis

303

## 304 **Discussion**

305 This study characterizes longitudinal HIV care continuum outcomes among YLHIV newly  
306 initiating HIV care in nine publicly funded health care facilities in rural South Africa pre- and  
307 post-implementation of the UTT policy. Overall, 82% of individuals had linked to care, 63% had  
308 initiated ART, and 31% had achieved viral suppression by one year following diagnosis. There  
309 were modest improvements in time spent on ART and virally suppressed among YLHIV  
310 diagnosed after the adoption of the UTT policy. However, the proportion of individuals  
311 diagnosed in the UTT era who had initiated ART, were retained in care, and were virally  
312 suppressed one year following diagnosis was well below the Joint United Nations' Programme  
313 on HIV/AIDS' 95-95-95 goal. A substantial proportion of individuals diagnosed in the UTT era  
314 disengaged from care in the periods between diagnosis and linkage to care and ART initiation  
315 and viral suppression.

316  
317 Approximately 66% of individuals diagnosed during the UTT era initiated ART in the first year  
318 following diagnosis. The mean time spent suppressed during this period was 60 days and just  
319 25% of individuals were suppressed at the end of follow-up. This represents a substantial gap in  
320 sustained retention on ART and viral suppression among YLHIV diagnosed in the era of UTT  
321 that must be urgently addressed.

322  
323 Implementation of UTT appeared to influence the timing of care disengagement among YLHIV  
324 in this study. Specifically, those diagnosed in the pre-UTT era were more likely to be LTFU  
325 between linkage to care and ART initiation while those diagnosed in the UTT era were more  
326 likely to be LTFU between diagnosis and linkage to care. This suggests individuals diagnosed

327 during the UTT era may have been less likely to return to care to start ART if they were not  
328 initiated the same day they were diagnosed. Existing evidence suggests low ART readiness may  
329 impede retention in care following diagnosis in the UTT era (34). For example, a study of adults  
330 immediately referred for ART in South Africa found that individuals who did not expect to  
331 receive a positive HIV diagnosis had significantly lower odds of ART readiness than others  
332 (adjusted odds ratio 0.26; 95% CI: 0.09, 0.78) and that the odds of linkage to care among those  
333 expressing treatment readiness were 2.97 times that in individuals who were not ready to initiate  
334 ART (34,35).

335  
336 These findings have important implications for HIV policy and programming for South African  
337 YLHIV in the UTT era. First, improved counseling and linkage to care at the point of diagnosis  
338 with HIV may be critical to the success of same-day ART initiation policies. Second, increased  
339 resources in the UTT era should be spent on retention in care efforts for YLHIV, particularly in  
340 the periods between diagnosis and linkage to care and ART initiation and viral suppression.  
341 Longitudinal counseling following diagnosis has been shown to improve linkage to care in other  
342 settings across sub-Saharan Africa (36,37). For example, in a cluster randomized controlled trial  
343 exploring the effects of a counseling intervention on treatment outcomes among people living  
344 with HIV in Uganda, those in the intervention arm were significantly more likely to link to care  
345 compared to those in the control arm (37). Differentiated, youth-friendly medical care and  
346 programs that target improvements in young people's self-esteem, social support, and overall  
347 psychosocial well-being may also be important to improving care outcomes for YLHIV (38–44).  
348 A retrospective cohort study of youth initiating ART at 37 facilities in South Africa  
349 demonstrated just 19% of study participants receiving support services were non-suppressed 5-

350 years after ART initiation compared to 37% of those who did not receive community based-  
351 services (44). Care models such as these should be prioritized for South African YLHIV  
352 particularly in the critical first year following diagnosis.

353  
354 Increased attention must also center on monitoring care services for this group, specifically.  
355 While the cross-sectional HIV care cascade (45) is useful in describing the proportion of  
356 individuals in each stage of the care continuum at a specific point in time, it provides a mere  
357 snapshot of the true patient experience (2,46). Longitudinal HIV care cascades allow for a  
358 nuanced exploration of population-level outcomes over time (1,2) and can aid in assessing the  
359 effectiveness of HIV care programs as individuals progress through each stage of the continuum.  
360 Ultimately, these cascades can be harnessed to identify specific gaps in treatment and care  
361 services at precise time points following diagnosis (1,3).

362  
363 This analysis had limitations. First, viral load monitoring is recommended just once per year  
364 under the South African National HIV Treatment guidelines (28). Because we were primarily  
365 interested in assessing HIV treatment outcomes in the first year following an individual's  
366 diagnosis, most participants had one opportunity to achieve viral suppression during the study  
367 period. Among those who achieved viral suppression, true time to viral suppression may have  
368 been shorter but went uncaptured because of infrequent viral load monitoring. Similarly,  
369 virologic failure among individuals who achieved suppression may have been under-captured  
370 due to infrequent viral load monitoring. Misclassified person-time could subsequently result in  
371 biased effect estimates. Second, mortality and migration data were only accessible from 2014-  
372 2017. Individuals who died in 2018 and were not yet administratively censored or LTFU before

373 the time of death would have misclassified person-time. Given just one participant died in the  
374 2014-2017 follow-up period, this was a minor concern. Lastly, the nature of the Clinic Link  
375 System prevented us from reliably ascertaining the reason for individuals' LTFU. It is possible  
376 that individuals who were classified as LTFU transferred into care at a clinic outside the nine  
377 included health care facilities, as documented in other studies (24,25). Individuals who  
378 transferred care and were classified as LTFU may have progressed through additional stages in  
379 the HIV care continuum during the one-year follow-up period, though we do not expect  
380 differential migration with respect to treatment era.

381

## 382 **Conclusions**

383 Implementation of the World Health Organization's UTT policy yielded modest improvements  
384 in the time spent on ART and virally suppressed among South African YLHIV. However, with  
385 just 66% of YLHIV diagnosed in the UTT era initiating ART, and just 25% virally suppressed  
386 one year following diagnosis, meeting UNAIDS 95-95-95 targets remains a challenge. HIV  
387 treatment programs and policies for YLHIV in the UTT era should specifically center on  
388 improving longitudinal care outcome monitoring and retention in care in the periods immediately  
389 following diagnosis and ART initiation.

390

## 391 **Abbreviations**

|     |      |                                                             |
|-----|------|-------------------------------------------------------------|
| 392 | ART  | anti-retroviral therapy                                     |
| 393 | HDSS | Health and Socio-Demographic Surveillance System study area |
| 394 | HIV  | human-immunodeficiency virus                                |
| 395 | LTFU | lost-to follow-up                                           |

396 UNAIDS United Nations' Joint Programme on HIV/AIDS

397 UTT Universal Test and Treat policy

398 YLHIV youth living with HIV

399

## 400 **Declarations**

### 401 **Ethics approval and consent to participate**

402 This study was approved by the University of North Carolina at Chapel Hill's Institutional  
403 Review Board, the University of the Witwatersrand's Human Research Ethics Committee, and  
404 the Mpumalanga Provincial Health Research Committee. All individuals provided written  
405 informed consent or assent for inclusion of their electronic health records in the Agincourt-  
406 HDSS Clinic Link System.

### 407 **Consent for publication**

408 Not applicable.

### 409 **Availability of data and materials**

410 The datasets analyzed during the current study are not publicly available due to the sensitive nature  
411 of HIV treatment and care data. Data may be made available from the study team on reasonable  
412 request.

### 413 **Competing interests**

414 Funding acknowledgments are listed below under the "Funding" section. The authors declare  
415 that they have no other competing interests.

### 416 **Funding**

417 Author LMF was supported in part by ViiV Healthcare, NIH Research Training Grant # D43  
418 TW009340 funded by the Fogarty International Center, NINDS, NIMH, and NHBLI, and NIMHD

419 grant T37 MD014218; author JKE was supported in part by NIH award # K01AI125087 funded  
420 by NIAID; additional funding for this project was provided in part by the American people through  
421 the President's Emergency Plan for AIDS Relief (PEPFAR) and United States Agency for  
422 International Development (USAID) under the Cooperative Agreement Project SOAR  
423 (Supporting Operational AIDS Research), # AID-OAA-14-00060 and the Department of Science  
424 and Innovation, the University of the Witwatersrand, and the Medical Research Council, South  
425 Africa. The content of this publication is the sole responsibility of the authors and does not  
426 necessarily reflect the views or policies of the U.S. Agency for International Development,  
427 PEPFAR, or the National Institutes of Health, and does not imply endorsement by the U.S.  
428 Government.

#### 429 **Authors contributions**

430 LMF- Conceptualization; Funding; Project administration; Data curation; Formal analysis;  
431 Methodology; Writing- original draft; JKE- Conceptualization; Methodology; Writing- revising  
432 & editing; NM-Project administration; Data curation; Writing- revising & editing; FXGO-  
433 Project administration; Methodology; Writing- revising & editing; NH- Funding; Writing-  
434 revising & editing; BP- Methodology; Writing- revising & editing; AM- Methodology; Writing-  
435 revising & editing; KM- Methodology; Writing- revising & editing; CWK- Data curation;  
436 Project administration; Writing- revising & editing; MKD- Data curation; Writing- revising &  
437 editing; SAL- Funding; Methodology; Writing- revising & editing; KK- Funding; Methodology;  
438 Project administration; Writing- revising & editing; AP- Conceptualization; Funding;  
439 Methodology; Writing- revising & editing.

#### 440 **Acknowledgments**

441 The authors would like to thank all the individuals who participated in this study.

442

## 443 **References**

- 444 1. Jose S, Delpuch V, Howarth A, Burns F, Hill T, Porter K, et al. A continuum of HIV care  
445 describing mortality and loss to follow-up: a longitudinal cohort study. *The Lancet HIV*.  
446 2018 Jun 1;5(6):e301–8.
- 447 2. Mody A, Glidden D v, Eshun-Wilson I, Sikombe K, Simbeza S, Mukamba N, et al.  
448 Longitudinal Care Cascade Outcomes Among People Eligible for Antiretroviral Therapy  
449 Who Are Newly Linking to Care in Zambia: A Multistate Analysis. *Clinical Infectious*  
450 *Diseases* [Internet]. 2020 Dec 17 [cited 2021 Feb 11];71(10):e561–70. Available from:  
451 <https://academic.oup.com/cid/article/71/10/e561/5805511>
- 452 3. Lesko CR, Edwards JK, Moore RD, Lau B. A longitudinal, HIV care continuum: 10-year  
453 restricted mean time in each care continuum stage after enrollment in care, by history of  
454 IDU. *AIDS* [Internet]. 2016 [cited 2019 Oct 3];30(14):2227–34. Available from:  
455 <http://www.ncbi.nlm.nih.gov/pubmed/27314178>
- 456 4. Beer L, Mattson CL, Bradley H, Shouse RL. Trends in ART prescription and viral  
457 suppression among HIV-positive young adults in care in the United States, 2009-2013.  
458 *Journal of Acquired Immune Deficiency Syndromes*. 2017 Sep 1;76(1):e1–6.
- 459 5. Lee S, Kapogiannis BG, Allison S. Improving the youth HIV prevention and care  
460 continuums: The adolescent medicine trials network for HIV/AIDS interventions. Vol. 8,  
461 *JMIR Research Protocols*. JMIR Publications Inc.; 2019.
- 462 6. Zanoni BC, Mayer KH. The Adolescent and Young Adult HIV Cascade of Care in the  
463 United States: Exaggerated Health Disparities. *AIDS Patient Care and STDs*. 2014 Mar  
464 1;28(3):128–35.



- 465 7. Enane LA, Davies MA, Leroy V, Edmonds A, Apondi E, Adedimeji A, et al. Traversing  
466 the cascade: urgent research priorities for implementing the “treat all” strategy for children  
467 and adolescents living with HIV in sub-Saharan Africa. *Journal of Virus Eradication*.  
468 2018;4(Suppl 2):40–6.
- 469 8. UNAIDS. Ending the AIDS epidemic for adolescents, with adolescents. Geneva,  
470 Switzerland; 2016. 2030 p.
- 471 9. Slogrove AL, Sohn AH. The global epidemiology of adolescents living with HIV: Time  
472 for more granular data to improve adolescent health outcomes. Vol. 13, *Current Opinion*  
473 *in HIV and AIDS*. Lippincott Williams and Wilkins; 2018. p. 170–8.
- 474 10. Zanoni BC, Archary M, Buchan S, Katz IT, Haberer JE. Systematic review and meta-  
475 analysis of the adolescent HIV continuum of care in South Africa: the Cresting Wave.  
476 *BMJ Global Health*. 2016;1(e000004).
- 477 11. Pillay Y, Pillay A. Implementation of the Universal Test and Treat strategy for HIV  
478 positive patients and differentiated care for stable patients. Pretoria, South Africa; 2016.
- 479 12. Lippman SA, El Ayadi AM, Grignon JS, Puren A, Liegler T, Venter WDF, et al.  
480 Improvements in the South African HIV care cascade: findings on 90-90-90 targets from  
481 successive population-representative surveys in North West Province. *J Int AIDS Soc*.  
482 2019 Jun 1;22(6).
- 483 13. Onoya D, Hendrickson C, Sineke T, Maskew M, Long L, Bor J, et al. Attrition in HIV  
484 care following HIV diagnosis: a comparison of the pre-UTT and UTT eras in South  
485 Africa. *J Int AIDS Soc*. 2021 Feb 1;24(2).

- 486 14. Pettifor A, Filiatreau L, Delany-Moretlwe S. Time to strengthen HIV treatment and  
487 prevention for youth. *The Lancet HIV* [Internet]. 2019 Oct [cited 2019 Oct 5];6(11).  
488 Available from: <https://linkinghub.elsevier.com/retrieve/pii/S2352301819302322>
- 489 15. Davies MA, Pinto J. Targeting 90-90-90 - Don't leave children and adolescents behind. *J*  
490 *Int AIDS Soc.* 2015;18(Suppl 6):20745.
- 491 16. Gleeson HS, Oliveras Rodriguez CA, Hatane L, Hart D. Ending AIDS by 2030: The  
492 importance of an interlinked approach and meaningful youth leadership: The. *J Int AIDS*  
493 *Soc.* 2018;21:e25061.
- 494 17. Kahn K, Collinson MA, Xavier Gómez-olivé F, Mokoena O, Twine R, Mee P, et al.  
495 Profile: Agincourt health and socio-demographic surveillance system. *International*  
496 *Journal of Epidemiology.* 2012 Aug 1;41(4):988–1001.
- 497 18. MRC/Wits Agincourt Research Unit. Research Findings – MRC/Wits Agincourt Unit  
498 [Internet]. 2014 [cited 2019 May 31]. Available from:  
499 [https://www.agincourt.co.za/?page\\_id=1911](https://www.agincourt.co.za/?page_id=1911)
- 500 19. Gómez-Olivé FX, Angotti N, Houle B, Klipstein-Grobusch K, Kabudula C, Menken J, et  
501 al. Prevalence of HIV among those 15 and older in rural South Africa. *AIDS Care -*  
502 *Psychological and Socio-Medical Aspects of AIDS/HIV.* 2013;25(9):1122–8.
- 503 20. Collinson MA, White MJ, Bocquier P, McGarvey ST, Afolabi SA, Clark SJ, et al.  
504 Migration and the epidemiological transition: Insights from the Agincourt sub-district of  
505 northeast South Africa. *Global Health Action.* 2014;7(SUPP.1).
- 506 21. West R, Leslie H, Gómez-Olivé FX, Kahn K, Twine R, Filiatreau L, et al. Using multiple  
507 modes of assessment to measure patient experience in public clinics in rural Mpumalanga,  
508 South Africa. In: *South African AIDS Conference.* Durban, South Africa; 2019.

- 509 22. Kabudula CW, Clark BD, Gómez-Olivé FX, Tollman S, Menken J, Reniers G. The  
510 promise of record linkage for assessing the uptake of health services in resource  
511 constrained settings: a pilot study from South Africa. *BMC Medical Research*  
512 *Methodology*. 2014 Dec 24;14(1):71.
- 513 23. Lippman SA, Pettifor A, Rebombo D, Julien A, Wagner RG, Kang Dufour MS, et al.  
514 Evaluation of the Tsimba community mobilization intervention to improve engagement in  
515 HIV testing and care in South Africa: Study protocol for a cluster randomized trial.  
516 *Implementation Science*. 2017 Jan 17;12(1):1–13.
- 517 24. Etoori D, Gomez-Olive FX, Reniers G, Rice B, Renju J, Kabudula CW, et al. Outcomes  
518 After Being Lost to Follow-up Differ for Pregnant and Postpartum Women When  
519 Compared With the General HIV Treatment Population in Rural South Africa. *J Acquir*  
520 *Immune Defic Syndr [Internet]*. 2020 Oct 1 [cited 2021 Aug 31];85(2):127–37. Available  
521 from: [/pmc/articles/PMC7495979/](https://pubmed.ncbi.nlm.nih.gov/34459799/)
- 522 25. Etoori D, Wringe A, Kabudula CW, Renju J, Rice B, Gomez-Olive FX, et al.  
523 Misreporting of Patient Outcomes in the South African National HIV Treatment Database:  
524 Consequences for Programme Planning, Monitoring, and Evaluation. *Frontiers in Public*  
525 *Health*. 2020 Apr 7;8:100.
- 526 26. Sherman GG, Mazanderani AH, Barron P, Bhardwaj S, Niit R, Okobi M, et al. Toward  
527 elimination of mother-to-child transmission of HIV in South Africa: How best to monitor  
528 early infant infections within the Prevention of Mother-to-Child Transmission Program.  
529 *Journal of Global Health*. 2017 Apr 12;7(1).

- 530 27. Girdwood SJ, Crompton T, Sharma M, Dorward J, Garrett N, Drain PK, et al. Cost-  
531 effectiveness of adoption strategies for point of care HIV viral load monitoring in South  
532 Africa. *EClinicalMedicine*. 2020 Nov 1;28:100607.
- 533 28. Department of Health Republic of South Africa. Adherence Guidelines for HIV, TB and  
534 NCDs. Policy and service guidelines for linkage to care, adherence to treatment and  
535 retention in care [Internet]. Pretoria, South Africa; 2016 [cited 2020 Sep 2]. Available  
536 from: [https://www.nacosa.org.za/wp-content/uploads/2016/11/Integrated-Adherence-](https://www.nacosa.org.za/wp-content/uploads/2016/11/Integrated-Adherence-Guidelines-NDOH.pdf)  
537 [Guidelines-NDOH.pdf](https://www.nacosa.org.za/wp-content/uploads/2016/11/Integrated-Adherence-Guidelines-NDOH.pdf)
- 538 29. Moosa A, Gengiah TN, Lewis L, Naidoo K. Long-term adherence to antiretroviral therapy  
539 in a South African adult patient cohort: a retrospective study. *BMC Infect Dis*. 2019 Sep  
540 5;19(1):775.
- 541 30. Kharsany ABM, Cawood C, Lewis L, Yende-Zuma N, Khanyile D, Puren A, et al. Trends  
542 in HIV Prevention, Treatment, and Incidence in a Hyperendemic Area of KwaZulu-Natal,  
543 South Africa. *JAMA Netw Open*. 2019 Nov 1;2(11):e1914378.
- 544 31. Kiweewa F, Esber A, Musingye E, Reed D, Crowell TA, Cham F, et al. HIV virologic  
545 failure and its predictors among HIV-infected adults on antiretroviral therapy in the  
546 African Cohort Study. *PLoS ONE*. 2019 Feb 1;14(2):e0211344.
- 547 32. Laprise C, De Pokomandy A, Baril JG, Dufresne S, Trottier H. Virologic failure following  
548 persistent low-level viremia in a cohort of HIV-positive patients: Results from 12 years of  
549 observation. *Clinical Infectious Diseases*. 2013 Nov 15;57(10):1489–96.
- 550 33. Efron B, Tibshirani R. *An Introduction to the Bootstrap*. 1st ed. Chapman and Hall/CRC;  
551 1994.

- 552 34. Maughan-Brown B, Harrison A, Galárraga O, Kuo C, Smith P, Bekker LG, et al. Factors  
553 affecting linkage to HIV care and ART initiation following referral for ART by a mobile  
554 health clinic in South Africa: evidence from a multimethod study. *Journal of Behavioral*  
555 *Medicine*. 2019 Oct 1;42(5):883–97.
- 556 35. Maughan-Brown B, Smith P, Kuo C, Harrison A, Lurie MN, Bekker LG, et al. Readiness  
557 for Antiretroviral Therapy: Implications for Linking HIV-Infected Individuals to Care and  
558 Treatment. *AIDS and Behavior*. 2018 Mar 1;22(3):691–700.
- 559 36. Hecce ME, Chi BH, Liao RC, Hoffmann CJ. Re-thinking Linkage to Care in the Era of  
560 Universal Test and Treat: Insights from Implementation and Behavioral Science for  
561 Achieving the Second 90. *AIDS and Behavior* [Internet]. 2019 Sep 1 [cited 2021 Feb  
562 26];23(2):120–8. Available from: <https://doi.org/10.1007/s10461-019-02541-5>
- 563 37. Ruzagira E, Grosskurth H, Kamali A, Baisley K. Brief counselling after home-based HIV  
564 counselling and testing strongly increases linkage to care: A cluster-randomized trial in  
565 Uganda. *J Int AIDS Soc* [Internet]. 2017 Oct 1 [cited 2021 Feb 26];20(2):e25014.  
566 Available from: <http://doi.wiley.com/10.1002/jia2.25014>
- 567 38. Willis N, Napei T, Armstrong A, Jackson H, Apollo T, Mushavi A, et al. Zvandiri-  
568 Bringing a Differentiated Service Delivery Program to Scale for Children, Adolescents,  
569 and Young People in Zimbabwe. *J Acquir Immune Defic Syndr* [Internet]. 2018 [cited  
570 2019 Sep 28];78 Suppl 2:S115–23. Available from:  
571 <http://www.ncbi.nlm.nih.gov/pubmed/29994833>
- 572 39. Reif LK, McNairy ML, Lamb MR, Fayorsey R, Elul B. Youth-friendly services and  
573 differentiated models of care are needed to improve outcomes for young people living

- 574 with HIV. *Current Opinion in HIV and AIDS* [Internet]. 2018 May 1 [cited 2021 Feb  
575 21];13(3):249–56. Available from: <https://pubmed.ncbi.nlm.nih.gov/29432230/>
- 576 40. Ruria EC, Masaba R, Kose J, Woelk G, Mwangi E, Matu L, et al. Optimizing linkage to  
577 care and initiation and retention on treatment of adolescents with newly diagnosed HIV  
578 infection. *AIDS* [Internet]. 2017 Jul 1 [cited 2021 Jan 6];31:S253–60. Available from:  
579 <http://journals.lww.com/00002030-201707013-00008>
- 580 41. Lamb MR, Fayorsey R, Nuwagaba-Biribonwoha H, Viola V, Mutabazi V, Alwar T, et al.  
581 High attrition before and after ART initiation among youth (15–24 years of age) enrolled  
582 in HIV care. *AIDS* [Internet]. 2014 Feb 20 [cited 2018 Jan 26];28(4):559–68. Available  
583 from: <http://www.ncbi.nlm.nih.gov/pubmed/24076661>
- 584 42. Bhana A, Mellins CA, Petersen I, Alicea S, Myeza N, Holst H, et al. The VUKA family  
585 program: piloting a family-based psychosocial intervention to promote health and mental  
586 health among HIV infected early adolescents in South Africa. *AIDS Care* [Internet]. 2014  
587 Jan [cited 2018 Jan 27];26(1):1–11. Available from:  
588 <http://www.ncbi.nlm.nih.gov/pubmed/23767772>
- 589 43. Casale M, Carlqvist A, Cluver L. Recent Interventions to Improve Retention in HIV Care  
590 and Adherence to Antiretroviral Treatment Among Adolescents and Youth: A Systematic  
591 Review. *AIDS Patient Care and STDs* [Internet]. 2019 Jun 1 [cited 2021 Aug  
592 3];33(6):237. Available from: </pmc/articles/PMC6588099/>
- 593 44. Fatti G, Jackson D, Goga AE, Shaikh N, Eley B, Nachega JB, et al. The effectiveness and  
594 cost-effectiveness of community-based support for adolescents receiving antiretroviral  
595 treatment: An operational research study in South Africa. *J Int AIDS Soc* [Internet]. 2018

- 596 Feb 1 [cited 2020 Dec 30];21(Suppl Suppl 1). Available from:  
597 <https://pubmed.ncbi.nlm.nih.gov/29485714/>
- 598 45. Gardner EM, McLees MP, Steiner JF, del Rio C, Burman WJ. The spectrum of  
599 engagement in HIV care and its relevance to test-and-treat strategies for prevention of  
600 HIV infection. *Clinical Infectious Diseases* [Internet]. 2011 Mar 15 [cited 2017 Sep  
601 17];52(6):793–800. Available from: [https://academic.oup.com/cid/article-](https://academic.oup.com/cid/article-lookup/doi/10.1093/cid/ciq243)  
602 [lookup/doi/10.1093/cid/ciq243](https://academic.oup.com/cid/article-lookup/doi/10.1093/cid/ciq243)
- 603 46. Nash D, Robertson MK. How to Evolve the Response to the Global HIV Epidemic With  
604 New Metrics and Targets Based on Pre-Treatment CD4 Counts [Internet]. Vol. 16,  
605 Current HIV/AIDS Reports. Current Medicine Group LLC 1; 2019 [cited 2021 Feb 16]. p.  
606 304–13. Available from: <https://pubmed.ncbi.nlm.nih.gov/31278620/>

607

## 608 **Additional Files**

609 S1 Table: Events of interest in longitudinal HIV care continuum

610 S2 Table: Equations for estimating the proportion of individuals in each stage of the continuum  
611 at any given time point during study follow-up

612 S1 Figure: Framework for flow through the longitudinal HIV care continuum

613 S2 Figure. Cumulative incidence of HIV care outcomes over the 1-year follow-up period in  
614 study population overall

615 S3 Table. Time spent in each stage of care continuum over 1-year follow-up period and percent  
616 of individuals in each stage at end of follow-up<sup>a</sup>

617 S4 Table. Time spent in each stage of the HIV care continuum over 1-year follow-up period by  
618 treatment era of diagnosis<sup>a</sup>

619 S5 Table. Proportion of participants in each stage of the HIV care continuum 1-year following  
620 diagnosis by treatment era of diagnosis<sup>a</sup>
